# Supplementary material for: The Red Queen Model of Recombination Hotspots Evolution in the Light of Archaic and Modern Human Genomes
Source: PubMed Central journal article supplement (PMC4230742; doi:10.1371/journal.pgen.1004790), 2014-11-13

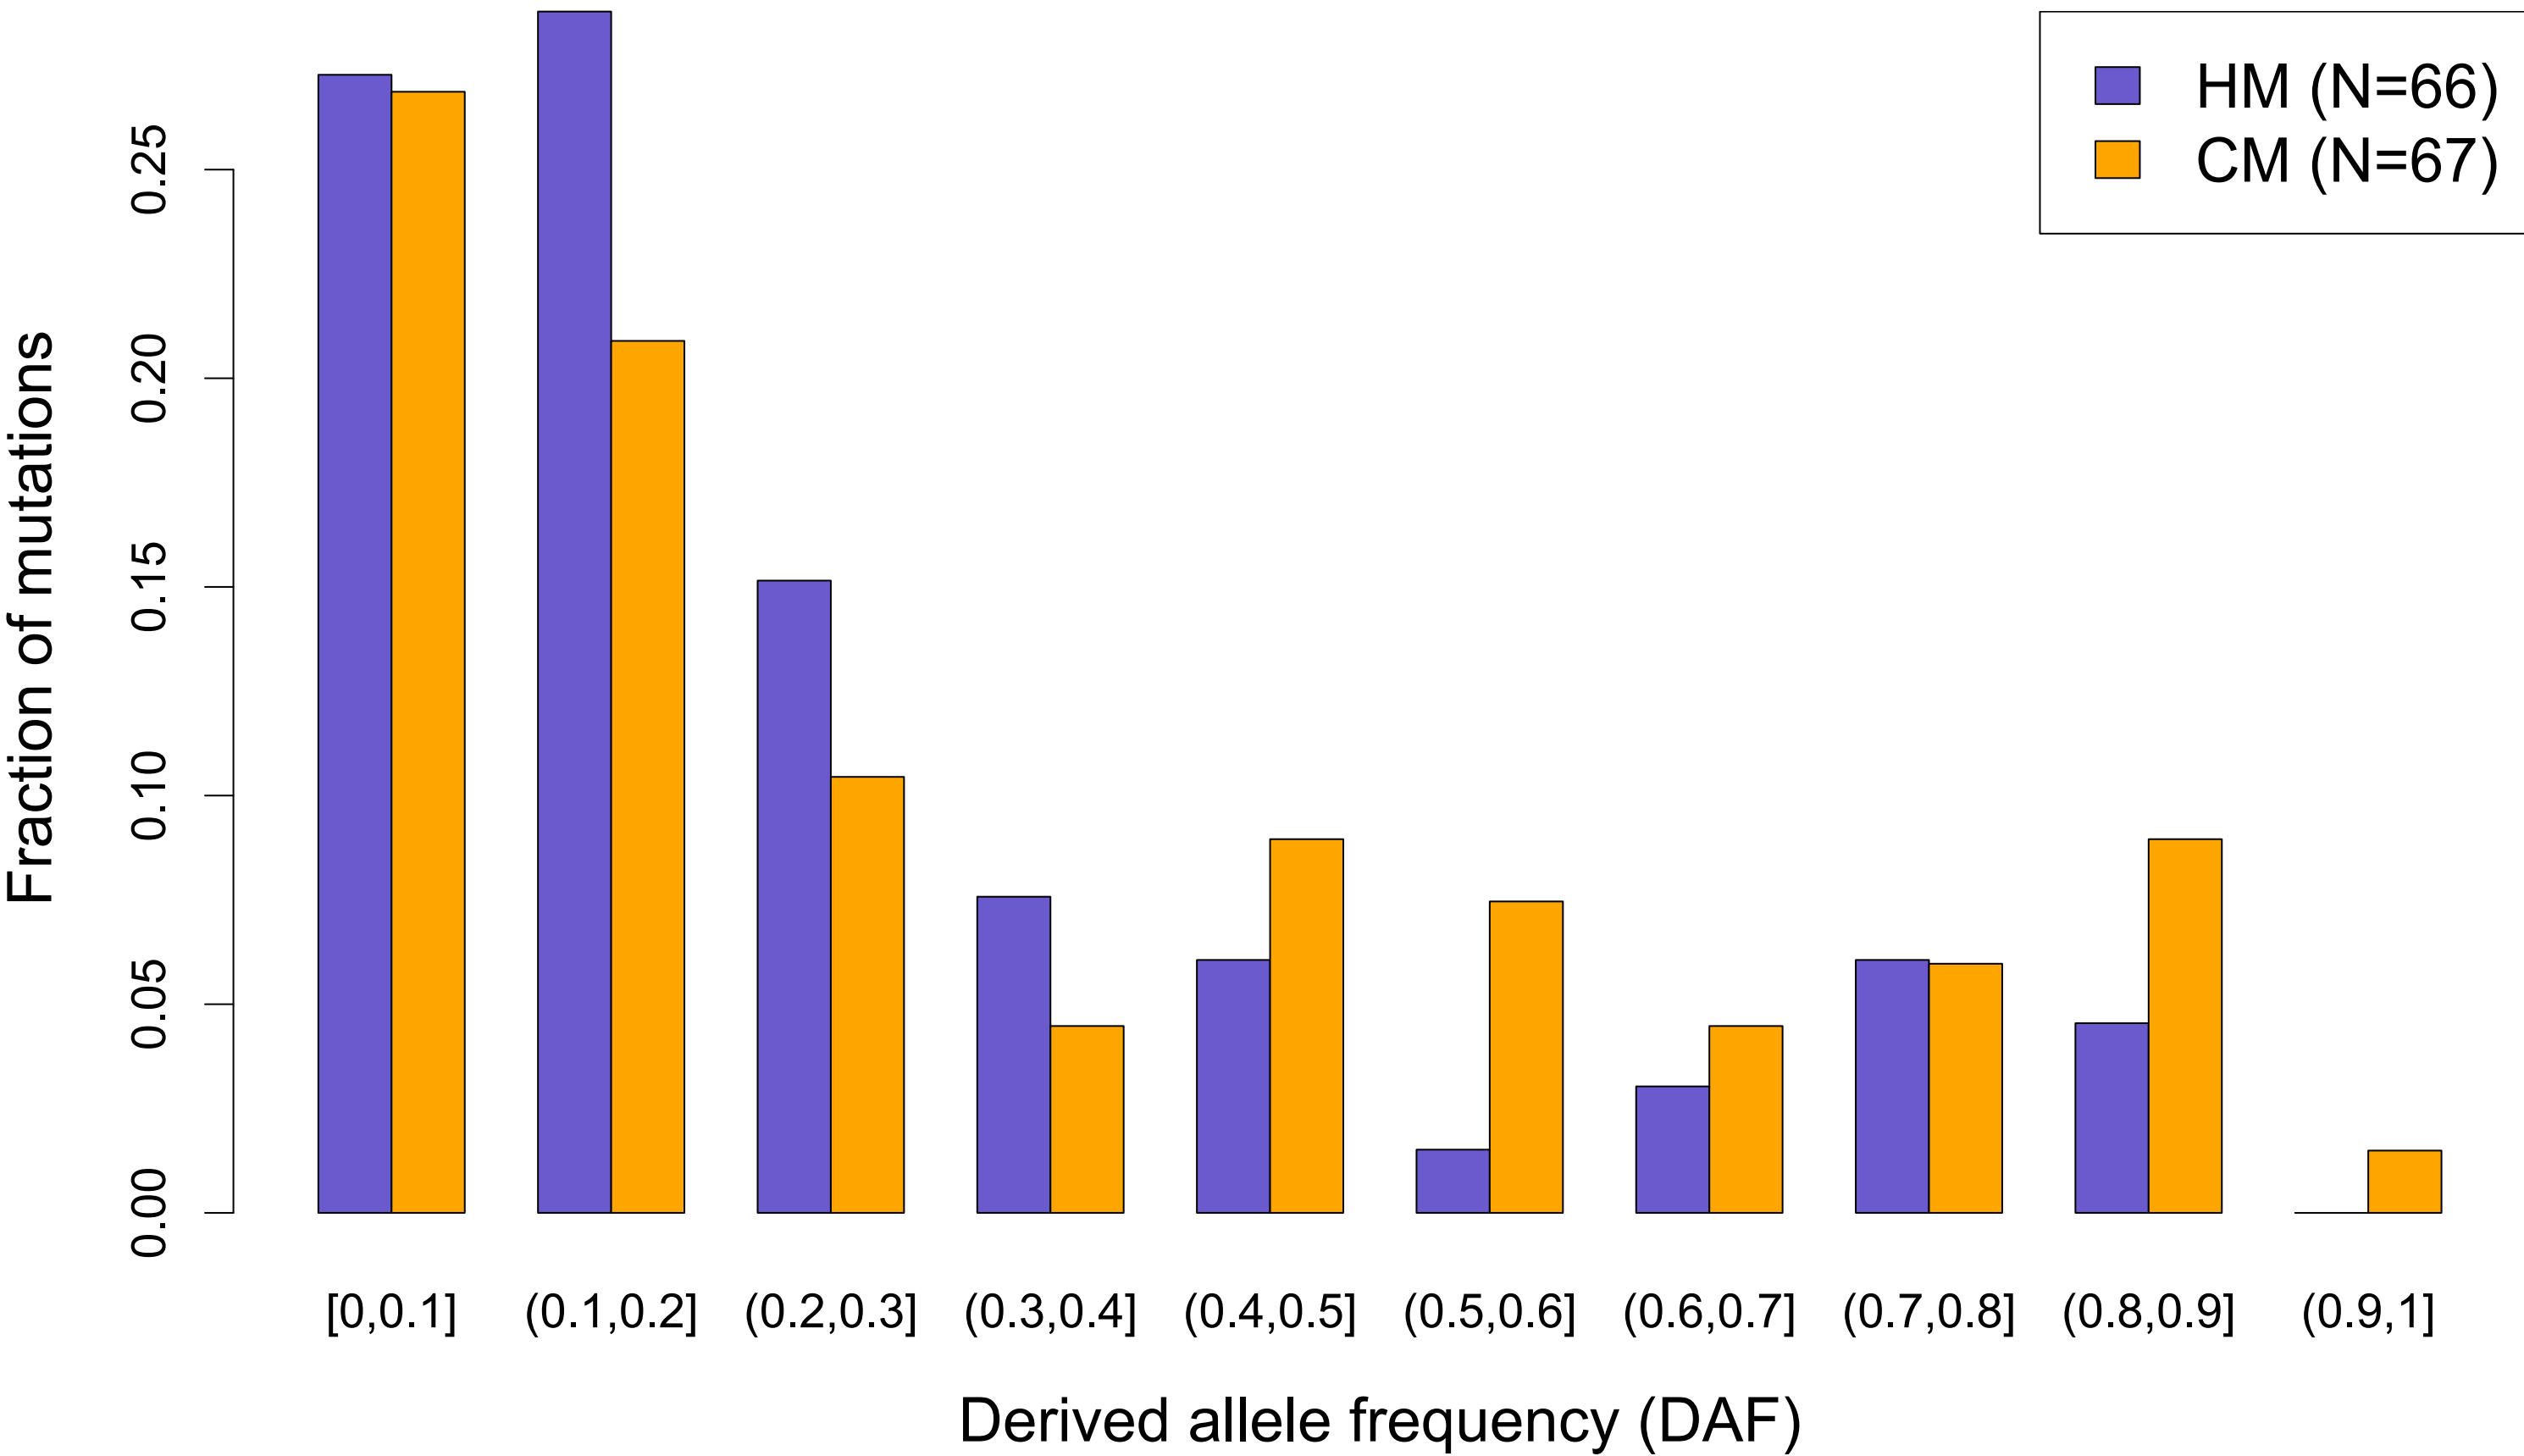

Supplement: pgen.1004790.s001.pdf [file pgen.1004790.s001.pdf]
