# Supplementary material for: The Red Queen Model of Recombination Hotspots Evolution in the Light of Archaic and Modern Human Genomes
Source: PubMed Central journal article supplement (PMC4230742; doi:10.1371/journal.pgen.1004790), 2014-11-13
Supplement: pgen.1004790.s009.pdf [file pgen.1004790.s009.pdf]

**Table S1. Motifs loss rates computed on F3 motif subset.**

| Branch     | N <sup>a</sup> |      | Rate <sup>b</sup> |      | HM/CM | p <sup>c</sup>       |
|------------|----------------|------|-------------------|------|-------|----------------------|
|            | HM             | CM   | HM                | CM   |       |                      |
| Chimpanzee | 2019           | 2274 | 5.2%              | 5.1% | 1.0   | 0.938                |
| Hominini   | 2019           | 2274 | 5.1%              | 4.3% | 1.2   | 0.071                |
| Denisovan  | 1908           | 2177 | 0.8%              | 0.4% | 2.0   | 0.078                |
| Human      | 1908           | 2177 | 1.9%              | 0.4% | 4.8   | 5.6 10 <sup>-6</sup> |

<sup>a</sup> Intact motif count at ancestral node of the branch (cf. Figure 1)

<sup>b</sup> Motif loss rate along the branch

<sup>c</sup> P-value of proportion test comparing HM vs. CM loss rates along the branch
