# Supplementary material for: The Red Queen Model of Recombination Hotspots Evolution in the Light of Archaic and Modern Human Genomes
Source: PubMed Central journal article supplement (PMC4230742; doi:10.1371/journal.pgen.1004790), 2014-11-13
Supplement: pgen.1004790.s010.pdf [file pgen.1004790.s010.pdf]

**Table S2. Motifs loss rates computed on F1 motif subset.**

| <b>Branch</b> | <b>N<sup>a</sup></b> |           | <b>Rate<sup>b</sup></b> |           | <b>HM/CM</b> | <b>p<sup>c</sup></b>  |
|---------------|----------------------|-----------|-------------------------|-----------|--------------|-----------------------|
|               | <b>HM</b>            | <b>CM</b> | <b>HM</b>               | <b>CM</b> |              |                       |
| Chimpanzee    | 5474                 | 5314      | 6.4%                    | 5.8%      | 1.1          | 0.209                 |
| Hominini      | 5474                 | 5314      | 5.3%                    | 4.3%      | 1.2          | 0.024                 |
| Denisovan     | 5185                 | 5084      | 1.1%                    | 0.7%      | 1.6          | 0.036                 |
| Human         | 5185                 | 5084      | 1.8%                    | 0.5%      | 3.6          | 5.7 10 <sup>-10</sup> |

<sup>a</sup> Intact motif count at ancestral node of the branch (cf. Figure 1)

<sup>b</sup> Motif loss rate along the branch

<sup>c</sup> P-value of proportion test comparing HM vs. CM loss rates along the branch
