# Supplementary material for: The Red Queen Model of Recombination Hotspots Evolution in the Light of Archaic and Modern Human Genomes
Source: PubMed Central journal article supplement (PMC4230742; doi:10.1371/journal.pgen.1004790), 2014-11-13
Supplement: pgen.1004790.s011.pdf [file pgen.1004790.s011.pdf]

**Table S3. Estimates of the dBGC intensity  $G$  on HM motifs in the human branch.**

| <b>Ncat<sup>a</sup></b> | <b>G<sup>b</sup></b> | <b>lnL0<sup>c</sup></b> | <b>lnL1<sup>c</sup></b> | <b>lnLmax<sup>d</sup></b> | <b>p-value<sup>e</sup></b> | <b>Gof<sup>f</sup></b> |
|-------------------------|----------------------|-------------------------|-------------------------|---------------------------|----------------------------|------------------------|
| 6                       | 9.30                 | -43.20                  | -28.82                  | -27.91                    | 8.23E-08                   | 0.87                   |
| 7                       | 7.61                 | -46.54                  | -34.26                  | -31.69                    | 7.14E-07                   | 0.53                   |
| 10                      | 9.55                 | -60.29                  | -46.67                  | -41.47                    | 1.79E-07                   | 0.32                   |
| 12                      | 8.55                 | -67.37                  | -54.17                  | -47.35                    | 2.75E-07                   | 0.25                   |
| 15                      | 6.93                 | -69.64                  | -59.81                  | -55.25                    | 9.27E-06                   | 0.82                   |
| 22                      | 8.55                 | -96.06                  | -82.57                  | -72.01                    | 2.06E-07                   | 0.45                   |
| 42                      | 8.26                 | -137.38                 | -124.23                 | -100.97                   | 2.91E-07                   | 0.26                   |

<sup>a</sup> number of DAF categories

<sup>b</sup> Population scaled BGC coefficient ( $G = 4N_e g$ )

<sup>c</sup> Log-likelihood of neutral model (L0) and BGC model (L1)

<sup>d</sup> see methods

<sup>e</sup> p-value of LRT test comparing M0 and M1

<sup>f</sup> Goodness of fit (see methods)
