# Supplementary material for: The Red Queen Model of Recombination Hotspots Evolution in the Light of Archaic and Modern Human Genomes
Source: PubMed Central journal article supplement (PMC4230742; doi:10.1371/journal.pgen.1004790), 2014-11-13
Supplement: pgen.1004790.s014.pdf [file pgen.1004790.s014.pdf]

**Table S6. Number of W to S substitutions in the Hominini and modern human branches used in Text S3.**

|                                                           | Focal sites (F) | Background sites (B) |
|-----------------------------------------------------------|-----------------|----------------------|
| Number of W sites in the human-chimpanzee ancestor        | $F_a = 1699374$ | $B_a = 1726440$      |
| Number of W to S substitutions in the Hominini branch     | $F_{12} = 7097$ | $B_{12} = 6742$      |
| Number of W to S substitutions in the modern human branch | $F_3 = 207$     | $B_3 = 83$           |
