# Supplementary material for: The Red Queen Model of Recombination Hotspots Evolution in the Light of Archaic and Modern Human Genomes
Source: PubMed Central journal article supplement (PMC4230742; doi:10.1371/journal.pgen.1004790), 2014-11-13
Supplement: pgen.1004790.s015.pdf [file pgen.1004790.s015.pdf]

**Table S7. Number of HM and CM motif losses in the Hominini and modern human branches used in Text S3.**

|                                                   | HM motifs (F)  | CM motifs (B)  |
|---------------------------------------------------|----------------|----------------|
| Number of motifs in the human-chimpanzee ancestor | $F_a = 4440$   | $B_a = 4392$   |
| Number of motif losses in the Hominini branch     | $F_{12} = 204$ | $B_{12} = 179$ |
| Number of motif losses in the modern human branch | $F_3 = 25$     | $B_3 = 1$      |
