# Supplementary material for: The Red Queen Model of Recombination Hotspots Evolution in the Light of Archaic and Modern Human Genomes
Source: PubMed Central journal article supplement (PMC4230742; doi:10.1371/journal.pgen.1004790), 2014-11-13
Supplement: pgen.1004790.s016.pdf [file pgen.1004790.s016.pdf]

>B\_den

TGTGGGCGGGCTTTAGCTGGAAGTCACACCTCCTCATTACCAGAGGATACACACAGGAGAGAAGCCCTATGTCTGCAG  
GGAG

>I\_den

TGTGGGCGGGTTTTGCAATAAGTCACACCTCCTCAGACACCAGAGGACACACACAGGGGAGAAGCCCTACGTCTGCAG  
GGAG
